# Supplementary material for: Individual differences in the perception of probability
Source: PLOS journal article supplement (doi:10.1371/journal.pcbi.1008871), 2021-04-01
Supplement: S1 (10.1371/journal.pcbi.1008871.s001) [file journal.pcbi.1008871.s001]

Supporting information:

# Individual differences in the perception of probability

Mel W. Khaw<sup>1</sup>, Luminita Stevens<sup>2</sup>, and Michael Woodford<sup>3</sup>

<sup>1</sup>Center for Cognitive Neuroscience, Duke University

<sup>2</sup>Department of Economics, University of Maryland

<sup>3</sup>Department of Economics, Columbia University

---

## S1 Appendix. Optimal Bayesian and Quasi-Bayesian Inference

Given a sample of  $T$  observations, the Bayesian forecaster determines the posterior distribution over  $(n, p)$ , where  $p$  is the most recent probability of drawing a green ring and  $n$  is the number of periods for which the current regime has lasted so far. The agent's prior is that the probability of drawing a green ring is drawn from the distribution  $f(p)$  and that there is a probability  $\delta$  of a new independent draw of this probability from one trial to the next.

A model of the data is specified by a probability  $p$  and a partition  $\pi = \{n_i\}$  of the sample into successive regimes, where  $n_i$  is the length of regime  $i$ . Let  $\tau_i$  denote the last observation of regime  $i$ . The likelihood of the most recent  $n$  observations if the regime has been  $p$  over that time is

$$L(n, p) = p^{k_n} (1 - p)^{n - k_n}, \quad (1)$$

where  $k_n$  is the number of successes in the  $n$  most recent observations. Let

$$L(n) \equiv \int L(n, p) f(p) dp \quad (2)$$

and let  $L_\tau(n)$  denote the average likelihood computed using the  $n$  observations ending with observation  $\tau$ . The ex-ante joint probability of the model  $(\pi, p)$  being correct and the data being a particular observed sequence is given by

$$\mu(\pi) \prod_{i=1}^{N(\pi)-1} L_{\tau_i}(n_i) f(p) L(n, p),$$

where  $N(\pi)$  is the number of regimes under partition  $\pi$  and  $\mu_\pi$  is the ex-ante probability of partition  $\pi$  occurring in a sample of length  $T$ ,

$$\mu(\pi) = (1 - \delta)^{T - N(\pi)} (\delta)^{N(\pi) - 1}. \quad (3)$$

Summing over the set  $\Pi(n)$  of all possible partitions for which the final regime is of length  $n$ , we define

$$Q(n) \equiv \sum_{\pi \in \Pi(n)} \mu(\pi) \prod_{i=1}^{N(\pi)-1} L_{\tau_i}(n_i). \quad (4)$$

The posterior probability of  $(n, p)$  is

$$P(n, p) = \frac{Q(n) f(p) L(n, p)}{\sum_{n \geq 1} Q(n) L(n)}. \quad (5)$$

The expected value of  $p$  sums over all  $n$  and integrates over  $p$  using the measure  $P(n, p)$ . The Bayesian estimate for the probability of drawing a 1 on the next observation takes into account the fact that the regime might change on the next draw, which occurs with probability  $\delta$ , and in which case, the estimate of the probability is 0.5:

$$B = (1 - \delta) \int \sum_{n \geq 1} p P(n, p) dp + \frac{\delta}{2}. \quad (6)$$

To compute the quasi-Bayesian forecasts, which potentially incorrectly weight new information when updating posterior beliefs, we replace the likelihood  $L(n, p)$  with  $[L(n, p)]^q$ , for some exponent  $q$ . The Bayesian optimum is nested under  $q = 1$ .

We implement the model recursively, by keeping track of  $k_t(n)$ , the number of green rings realized in the  $n$  observations ending with observation  $t$ , and  $Q_t(n)$ , the probability that the regime ending with observation  $t$  is of length  $n$ . We initialize the ring count with

$$k_t(1) = \begin{cases} 0 & \text{if red ring} \\ 1 & \text{if green ring} \end{cases}$$

and, for  $1 < n \leq t$ , update it recursively according to

$$k_t(n) = \begin{cases} k_{t-1}(n-1) & \text{if red ring} \\ k_{t-1}(n-1) + 1 & \text{if green ring} \end{cases}$$

$Q_t(n)$  is initialized at  $Q_1(1) = 1$  and then updated recursively according to

$$Q_t(n) = \begin{cases} \delta \sum_{n=1}^{t-1} Q_{t-1}(n) L(n) & \text{for } t > 1, n = 1 \text{ [new regime]} \\ (1 - \delta) Q_{t-1}(n) & \text{for } t > 1, 1 < n \leq t \text{ [no regime change]} \end{cases}$$

Using the values of  $\{k_t(n)\}$  we compute  $L(n, p)$  and  $L(n)$ , which, together with the values of  $\{Q_t(n)\}$  yield the posterior  $P(n, p)$ .
